# Supplementary material for: Identification of Anthocyanins and Optimization of Their Extraction from Rabbiteye Blueberry Fruits in Nanjing
Source: Hindawi journal article supplement (doi:10.1155/2019/6806790), 2019-02-04
Supplement: f1 [file 6806790.f1.zip]

样品名称: 花青素

=====

操作者 : 系统 序列行 : 6  
仪器 : 1200 位置 : P1-A-06  
进样日期 : 2018-8-6 19:45:40 进样次数 : 1  
进样量 : 10.000 µl

方法 : E:\CHEM32\1\DATA\汪雨茜\宝琳-20170828 2018-08-06 11-40-21\20180804-花青素-  
XYP.M (序列方法)

最后修改 : 2018-8-6 11:40:21 : 系统

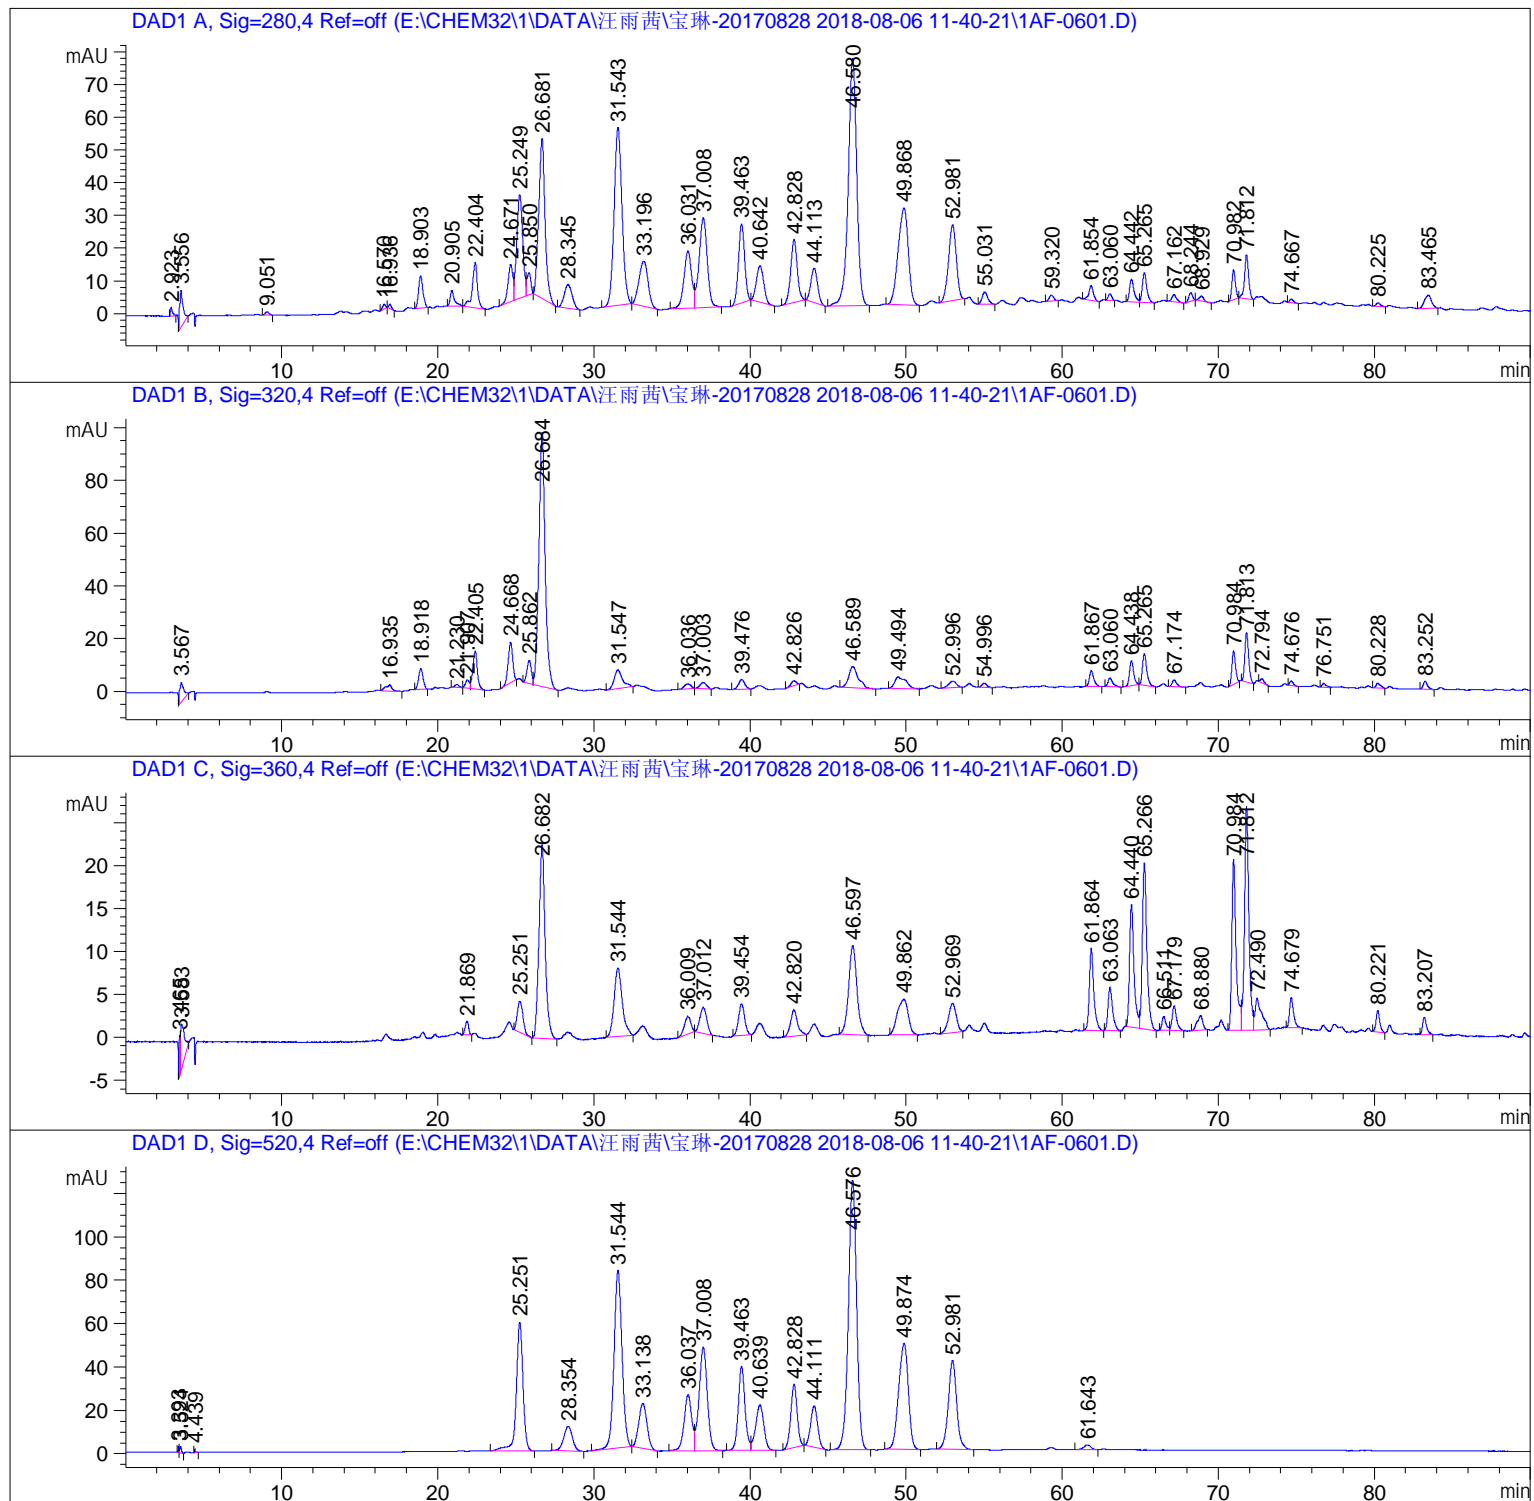

面积百分比报告

排序 : 信号  
乘积因子 : 1.0000  
稀释因子 : 1.0000  
内标使用乘积因子和稀释因子

信号 1: DAD1 A, Sig=280,4 Ref=off

| 峰<br># | 保留时间<br>[min] | 类型 | 峰宽<br>[min] | 峰面积<br>[mAU*s] | 峰高<br>[mAU] | 峰面积<br>% |
|--------|---------------|----|-------------|----------------|-------------|----------|
| 1      | 2.923         | BB | 0.1318      | 23.00185       | 2.53730     | 0.1446   |
| 2      | 3.556         | BB | 0.1993      | 173.67172      | 11.42789    | 1.0916   |
| 3      | 9.051         | BB | 0.2314      | 17.56735       | 1.09358     | 0.1104   |
| 4      | 16.570        | BB | 0.2122      | 18.11489       | 1.35335     | 0.1139   |
| 5      | 16.936        | BB | 0.1713      | 14.51836       | 1.29005     | 0.0913   |
| 6      | 18.903        | BB | 0.2928      | 193.39520      | 9.85957     | 1.2155   |
| 7      | 20.905        | BB | 0.2722      | 90.35609       | 4.83108     | 0.5679   |
| 8      | 22.404        | BB | 0.3336      | 310.68155      | 13.75161    | 1.9527   |
| 9      | 24.671        | BV | 0.3203      | 245.14032      | 11.42552    | 1.5408   |
| 10     | 25.249        | VV | 0.4080      | 846.23688      | 31.64238    | 5.3189   |
| 11     | 25.850        | VB | 0.2654      | 114.23219      | 6.68459     | 0.7180   |
| 12     | 26.681        | BB | 0.4112      | 1370.91296     | 48.88360    | 8.6166   |
| 13     | 28.345        | BB | 0.5031      | 258.70151      | 7.27151     | 1.6260   |
| 14     | 31.543        | BB | 0.5434      | 1917.03943     | 54.36290    | 12.0492  |
| 15     | 33.196        | BB | 0.5948      | 558.99640      | 13.85152    | 3.5135   |
| 16     | 36.031        | BV | 0.5114      | 601.28003      | 17.47573    | 3.7792   |
| 17     | 37.008        | VB | 0.5575      | 996.02557      | 27.44176    | 6.2603   |
| 18     | 39.463        | BB | 0.4270      | 665.76245      | 24.19561    | 4.1845   |
| 19     | 40.642        | BB | 0.4971      | 360.44302      | 11.09131    | 2.2655   |
| 20     | 42.828        | BB | 0.4399      | 563.30127      | 19.33580    | 3.5405   |
| 21     | 44.113        | BB | 0.4643      | 315.91815      | 10.52214    | 1.9856   |
| 22     | 46.580        | BB | 0.5760      | 2864.77295     | 75.62183    | 18.0060  |
| 23     | 49.868        | BB | 0.6646      | 1336.47729     | 29.61060    | 8.4002   |
| 24     | 52.981        | BB | 0.5324      | 809.70056      | 23.24393    | 5.0892   |
| 25     | 55.031        | BB | 0.3411      | 93.11752       | 3.70647     | 0.5853   |
| 26     | 59.320        | BB | 0.2982      | 36.60567       | 1.76329     | 0.2301   |
| 27     | 61.854        | BB | 0.2961      | 89.63194       | 4.46683     | 0.5634   |
| 28     | 63.060        | BB | 0.2357      | 30.28526       | 1.98809     | 0.1904   |
| 29     | 64.442        | BV | 0.3023      | 142.78413      | 6.99108     | 0.8974   |
| 30     | 65.265        | VB | 0.2945      | 177.60170      | 9.06644     | 1.1163   |
| 31     | 67.162        | BB | 0.2985      | 47.76793       | 2.24244     | 0.3002   |
| 32     | 68.244        | BB | 0.2406      | 43.27501       | 2.59438     | 0.2720   |
| 33     | 68.929        | BB | 0.2719      | 30.58233       | 1.51280     | 0.1922   |
| 34     | 70.982        | BB | 0.2428      | 143.77357      | 9.17514     | 0.9037   |
| 35     | 71.812        | BB | 0.2717      | 239.09454      | 13.42816    | 1.5028   |
| 36     | 74.667        | BB | 0.2296      | 18.55898       | 1.16681     | 0.1166   |
| 37     | 80.225        | BB | 0.2662      | 22.07813       | 1.16978     | 0.1388   |
| 38     | 83.465        | BB | 0.4215      | 128.74055      | 4.06541     | 0.8092   |

总量 : 1.59101e4 522.14226

样品名称: 花青素

信号 2: DAD1 B, Sig=320,4 Ref=off

| 峰<br># | 保留时间<br>[min] | 类型 | 峰宽<br>[min] | 峰面积<br>[mAU*s] | 峰高<br>[mAU] | 峰面积<br>% |
|--------|---------------|----|-------------|----------------|-------------|----------|
| 1      | 3.567         | BB | 0.2296      | 134.25694      | 7.61755     | 2.0834   |
| 2      | 16.935        | BB | 0.3627      | 64.03332       | 2.31510     | 0.9937   |
| 3      | 18.918        | BB | 0.2986      | 157.89243      | 7.85125     | 2.4502   |
| 4      | 21.230        | BB | 0.2430      | 19.81412       | 1.13888     | 0.3075   |
| 5      | 21.907        | BV | 0.2480      | 53.01396       | 3.09307     | 0.8227   |
| 6      | 22.405        | VB | 0.2978      | 288.84680      | 14.41440    | 4.4824   |
| 7      | 24.668        | BB | 0.3165      | 315.69931      | 15.44618    | 4.8991   |
| 8      | 25.862        | BV | 0.2985      | 173.40851      | 8.77743     | 2.6910   |
| 9      | 26.684        | VB | 0.4099      | 2693.67773     | 96.43958    | 41.8012  |
| 10     | 31.547        | BB | 0.4981      | 258.81827      | 6.98813     | 4.0164   |
| 11     | 36.036        | BB | 0.3573      | 53.63493       | 1.88856     | 0.8323   |
| 12     | 37.003        | BB | 0.3630      | 67.62085       | 2.29973     | 1.0494   |
| 13     | 39.476        | BB | 0.3916      | 100.08637      | 3.60839     | 1.5532   |
| 14     | 42.826        | BB | 0.3098      | 45.00111       | 1.88967     | 0.6983   |
| 15     | 46.589        | BB | 0.5790      | 346.76819      | 8.14074     | 5.3812   |
| 16     | 49.494        | BB | 0.6446      | 221.67218      | 4.43915     | 3.4400   |
| 17     | 52.996        | BB | 0.4145      | 87.82835       | 2.53303     | 1.3629   |
| 18     | 54.996        | BB | 0.2986      | 37.52441       | 1.60599     | 0.5823   |
| 19     | 61.867        | BB | 0.2856      | 118.32905      | 6.06435     | 1.8363   |
| 20     | 63.060        | BB | 0.2962      | 68.43424       | 3.26986     | 1.0620   |
| 21     | 64.438        | BB | 0.2853      | 172.88036      | 9.28194     | 2.6828   |
| 22     | 65.265        | BB | 0.2902      | 227.06241      | 11.92204    | 3.5236   |
| 23     | 67.174        | BB | 0.2681      | 50.60162       | 2.61155     | 0.7852   |
| 24     | 70.984        | BB | 0.2455      | 200.57191      | 12.61346    | 3.1125   |
| 25     | 71.813        | BB | 0.2577      | 314.89163      | 18.77184    | 4.8866   |
| 26     | 72.794        | BB | 0.2451      | 23.01788       | 1.46659     | 0.3572   |
| 27     | 74.676        | BB | 0.2313      | 28.09658       | 1.80800     | 0.4360   |
| 28     | 76.751        | BB | 0.2557      | 26.06851       | 1.46394     | 0.4045   |
| 29     | 80.228        | BB | 0.2827      | 37.01687       | 1.87195     | 0.5744   |
| 30     | 83.252        | BB | 0.2818      | 57.45201       | 3.04916     | 0.8916   |

总量 : 6444.02085 264.68151

信号 3: DAD1 C, Sig=360,4 Ref=off

| 峰<br># | 保留时间<br>[min] | 类型 | 峰宽<br>[min] | 峰面积<br>[mAU*s] | 峰高<br>[mAU] | 峰面积<br>% |
|--------|---------------|----|-------------|----------------|-------------|----------|
| 1      | 3.465         | BV | 0.0687      | 20.62927       | 4.74671     | 0.4655   |
| 2      | 3.583         | VB | 0.2169      | 88.77634       | 5.26060     | 2.0033   |
| 3      | 21.869        | BB | 0.2191      | 24.31742       | 1.60236     | 0.5487   |
| 4      | 25.251        | BB | 0.3195      | 91.41426       | 3.63415     | 2.0628   |
| 5      | 26.682        | BB | 0.3992      | 620.49915      | 22.53778    | 14.0020  |
| 6      | 31.544        | BB | 0.4758      | 290.39883      | 7.99395     | 6.5530   |
| 7      | 36.009        | BB | 0.3518      | 58.46284       | 2.04341     | 1.3193   |
| 8      | 37.012        | BB | 0.3738      | 93.13936       | 3.03677     | 2.1018   |
| 9      | 39.454        | BB | 0.3375      | 101.17525      | 3.69494     | 2.2831   |
| 10     | 42.820        | BB | 0.3788      | 96.61784       | 3.03962     | 2.1802   |
| 11     | 46.597        | BB | 0.5290      | 387.70285      | 10.34990    | 8.7488   |

样品名称：花青素

| 峰<br># | 保留时间<br>[min] | 类型 | 峰宽<br>[min] | 峰面积<br>[mAU*s] | 峰高<br>[mAU] | 峰面积<br>% |
|--------|---------------|----|-------------|----------------|-------------|----------|
| 12     | 49.862        | BB | 0.5661      | 198.57330      | 4.18109     | 4.4809   |
| 13     | 52.969        | BB | 0.4308      | 117.25616      | 3.41337     | 2.6460   |
| 14     | 61.864        | BB | 0.2891      | 191.85701      | 9.60152     | 4.3294   |
| 15     | 63.063        | BB | 0.2968      | 103.56345      | 5.01708     | 2.3370   |
| 16     | 64.440        | BV | 0.3027      | 285.12756      | 14.29618    | 6.4341   |
| 17     | 65.266        | VB | 0.3005      | 391.54297      | 19.31727    | 8.8354   |
| 18     | 66.511        | BV | 0.2353      | 29.66137       | 1.62238     | 0.6693   |
| 19     | 67.179        | VB | 0.2791      | 57.09162       | 2.90722     | 1.2883   |
| 20     | 68.880        | BB | 0.3122      | 43.80741       | 1.74920     | 0.9885   |
| 21     | 70.984        | BV | 0.2797      | 382.66269      | 19.95837    | 8.6350   |
| 22     | 71.812        | VV | 0.2887      | 507.48260      | 26.11895    | 11.4517  |
| 23     | 72.490        | VB | 0.3900      | 108.15443      | 3.68981     | 2.4406   |
| 24     | 74.679        | BB | 0.2657      | 63.41622       | 3.49408     | 1.4310   |
| 25     | 80.221        | BB | 0.2413      | 41.91380       | 2.50416     | 0.9458   |
| 26     | 83.207        | BB | 0.2469      | 36.27024       | 2.02570     | 0.8185   |

总量：4431.51425 187.83659

信号 4: DAD1 D, Sig=520,4 Ref=off

| 峰<br># | 保留时间<br>[min] | 类型 | 峰宽<br>[min] | 峰面积<br>[mAU*s] | 峰高<br>[mAU] | 峰面积<br>% |
|--------|---------------|----|-------------|----------------|-------------|----------|
| 1      | 3.393         | BV | 0.0489      | 8.84768        | 2.79824     | 0.0438   |
| 2      | 3.524         | VB | 0.1083      | 21.35385       | 2.95601     | 0.1056   |
| 3      | 4.439         | BB | 0.0632      | 7.08294        | 1.67943     | 0.0350   |
| 4      | 25.251        | BB | 0.4537      | 1778.62756     | 59.33470    | 8.7963   |
| 5      | 28.354        | BB | 0.5731      | 439.34497      | 11.36317    | 2.1728   |
| 6      | 31.544        | BB | 0.5464      | 2921.73901     | 81.85928    | 14.4495  |
| 7      | 33.138        | BB | 0.5563      | 767.98438      | 20.82179    | 3.7981   |
| 8      | 36.037        | BV | 0.5067      | 883.75970      | 25.85763    | 4.3707   |
| 9      | 37.008        | VB | 0.5601      | 1750.22583     | 47.69729    | 8.6558   |
| 10     | 39.463        | BV | 0.4534      | 1168.33398     | 38.78847    | 5.7780   |
| 11     | 40.639        | VB | 0.5437      | 768.59528      | 20.96746    | 3.8011   |
| 12     | 42.828        | BB | 0.4309      | 823.32532      | 29.20364    | 4.0718   |
| 13     | 44.111        | BB | 0.4760      | 596.16901      | 19.10816    | 2.9484   |
| 14     | 46.576        | BB | 0.5638      | 4563.08789     | 124.44386   | 22.5669  |
| 15     | 49.874        | BB | 0.6936      | 2116.60815     | 49.03656    | 10.4677  |
| 16     | 52.981        | BB | 0.5662      | 1533.73206     | 41.01914    | 7.5851   |
| 17     | 61.643        | BB | 0.3913      | 71.46072       | 2.26966     | 0.3534   |

总量：2.02203e4 579.20450

\*\*\* 报告结束 \*\*\*
