# Supplementary material for: Identification of Anthocyanins and Optimization of Their Extraction from Rabbiteye Blueberry Fruits in Nanjing
Source: Hindawi journal article supplement (doi:10.1155/2019/6806790), 2019-02-04
Supplement: f1 [file 6806790.f1.zip]

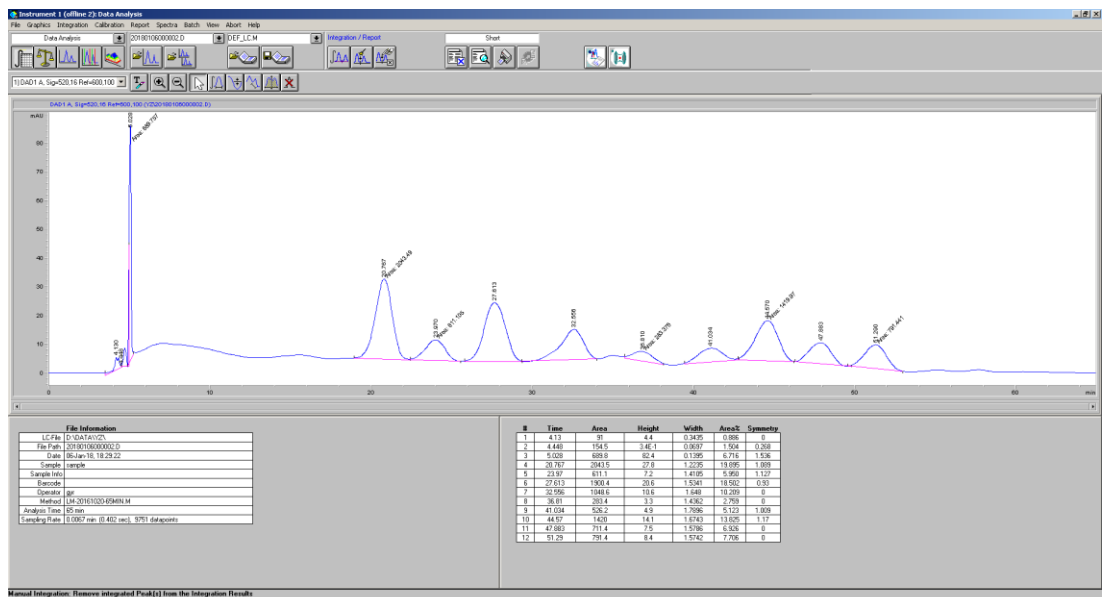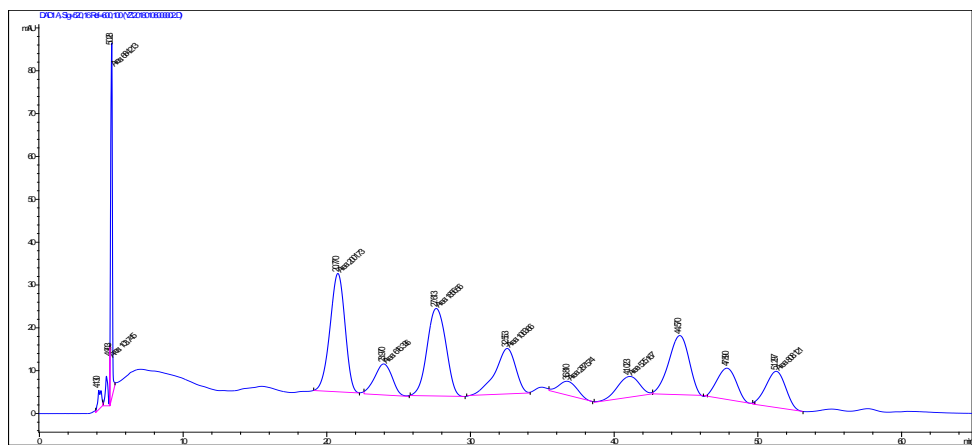

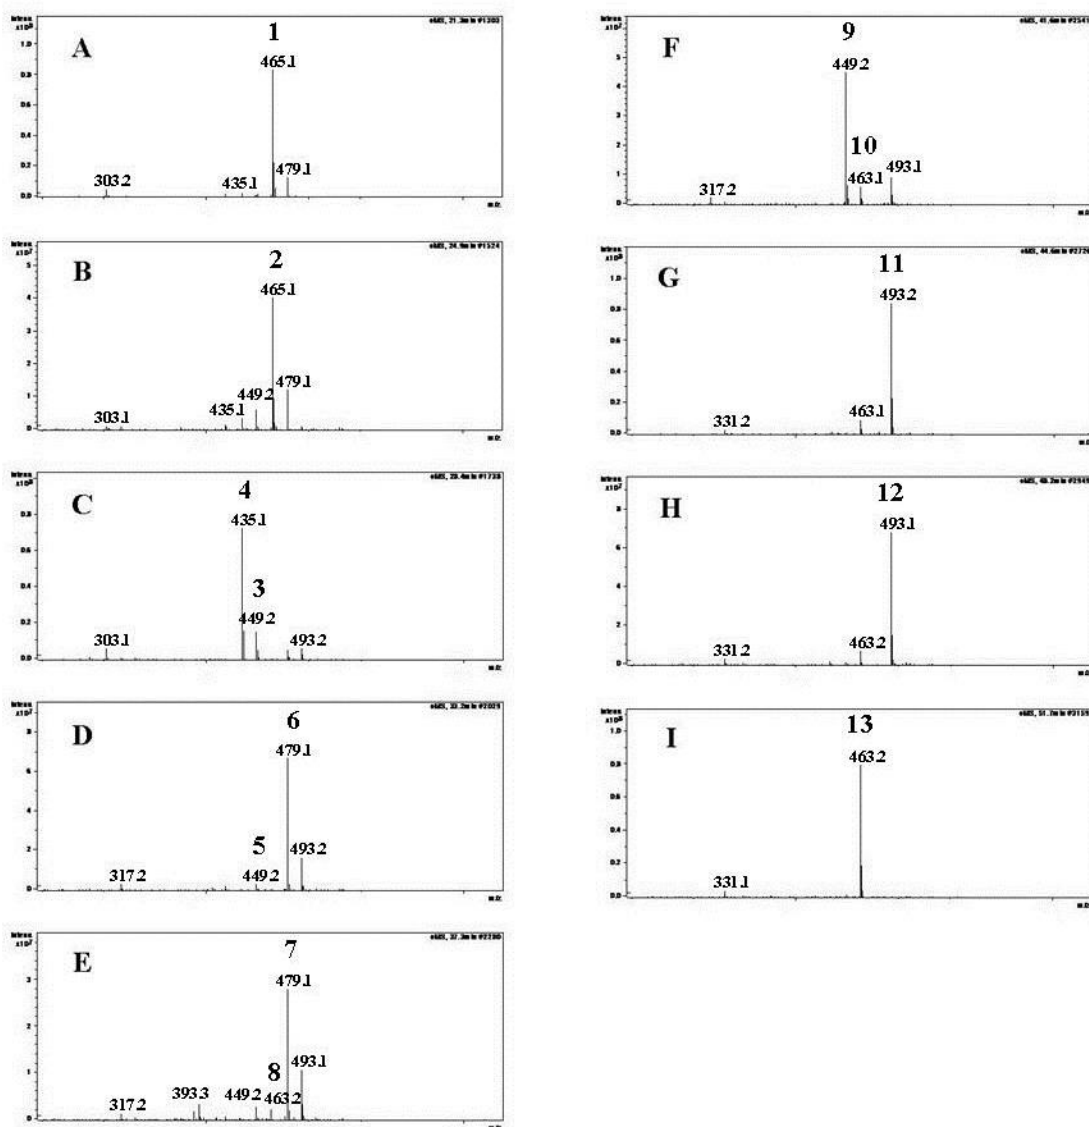

MS spectra of (A) peak 1: delphinidin-3-galactoside; (B) peak 2: delphinidin-3-glucoside; (C) peak 3: cyanidin-3-galactoside, peak 4: delphinidin-3-arabinoside; (D) peak 5: cyanidin-3-glucoside, peak 6: petunidin-3-galactoside; (E) peak 7: petunidin-3-glucoside, peak 8: peonidin-3-galactoside; (F) peak 9: petunidin-3-arabinoside, peak 10: peonidin-3-glucoside; (G) peak 11: malvidin-3-galactoside; (H) peak 12: malvidin-3-glucoside; (I) peak 13: malvidin-3-arabinoside
