# Supplementary material for: Identification of Anthocyanins and Optimization of Their Extraction from Rabbiteye Blueberry Fruits in Nanjing
Source: Hindawi journal article supplement (doi:10.1155/2019/6806790), 2019-02-04
Supplement: f1 [file 6806790.f1.zip]

Archive with 8 entries (8 files):
- 6806790.f1/Fig 1(a). Hydrochloric Acid.pzfx
- 6806790.f1/Fig 1(b). Ethanol Concentration.pzfx
- 6806790.f1/Fig 1(c). Extraction Time.pzfx
- 6806790.f1/Fig 1(d). Extraction Temperature.pzfx
- 6806790.f1/Fig 1(e). Liquid to Solid Ratio.pzfx
- 6806790.f1/HPLC.pdf
- 6806790.f1/HPLC-ESI-MS.pdf
- 6806790.f1/Supplementary data_Excel.xlsx
