# Supplementary material for: Identification of Anthocyanins and Optimization of Their Extraction from Rabbiteye Blueberry Fruits in Nanjing
Source: Hindawi journal article supplement (doi:10.1155/2019/6806790), 2019-02-04
Supplement: f1 [file 6806790.f1.zip › 6806790.f1/Supplementary data_Excel.xlsx]

## Sheet: Sheet1
Freeze fruit (g)	Volume (ml)	[HCl]	pH1.0				A0			pH4.5				A1			Content				[HCl]	Average content	SD	RSD
5.04	63.7	1 (0.02%)	520nm	0.743	0.8699	0.6682	0.5792	0.6831	0.5188	520nm	0.1547	0.1596	0.1436	0.1108	0.1104	0.1015	0.395433	0.483486	0.352294		1 (0.02%)	0.410404	0.066865	0.162925		HCl	0.41	0.358	0.359	0.308	0.352
			700nm	0.1638	0.1868	0.1494				700nm	0.0439	0.0492	0.0421													Ethanol	0.205	0.202	0.245	0.258	0.354
5.04	61.3	2 (0.05%)		0.7193	0.7243	0.7111	0.5713	0.5564	0.5484		0.1779	0.1936	0.1697	0.1165	0.1206	0.1172	0.369486	0.35405	0.350313		2 (0.05%)	0.35795	0.0101639	0.0283949		Temperature	0.494	0.517	0.452	0.497	0.505
				0.148	0.1679	0.1627					0.0614	0.073	0.0525													Time	0.544	0.499	0.552	0.571	0.563
4.98	63.2	3 (0.1%)		0.8536	0.68	0.6749	0.5625	0.5164	0.5122		0.1656	0.1407	0.1401	0.1136	0.1034	0.102	0.380526	0.350094	0.347721		3 (0.1%)	0.359447	0.0182936	0.0508937		Liquid to Solid Ratio	0.266	0.318	0.394	0.385	0.384
				0.2911	0.1636	0.1627					0.052	0.0373	0.0381
4.95	63.5	4 (0.3%)		0.6389	0.6179	0.529	0.4961	0.4835	0.4091		0.1512	0.1282	0.1462	0.1086	0.0957	0.1068	0.332038	0.332295	0.259032		4 (0.3%)	0.307788	0.0422241	0.137186
				0.1428	0.1344	0.1199					0.0426	0.0325	0.0394													Analysis of variance: no repeated two-factor analysis
5.05	63.5	5 (0.5%)		0.6882	0.6743	0.6935	0.5428	0.5382	0.5547		0.198	0.1914	0.1551	0.1344	0.1308	0.114	0.343017	0.342177	0.370146		5 (0.5%)	0.35178	0.0159109	0.0452297
				0.1454	0.1361	0.1388					0.0636	0.0606	0.0411													SUMMARY	Number of observations	Summation	Average	variance
																										Row 1	5	1.787	0.3574	0.0013098
Freeze fruit (g)	Volume (ml)	[Ethanol]																			[Ethanol]	Average content				Row 2	5	1.264	0.2528	0.0037987
5.08	64.5	1 (50%)		0.3159	0.3237	0.3625	0.302	0.3095	0.3483		0.0936	0.0955	0.0975	0.0761	0.0781	0.0798	0.191584	0.196249	0.227713		1 (50%)	0.205182	0.0196513	0.095775		Row 3	5	2.465	0.493	0.0006045
				0.0139	0.0142	0.0142					0.0175	0.0174	0.0177													Row 4	5	2.729	0.5458	0.0007907
5.09	64	2 (60%)		0.3388	0.3426	0.3393	0.3219	0.3266	0.3226		0.0952	0.0953	0.1003	0.0797	0.08	0.0895	0.203415	0.207111	0.195773		2 (60%)	0.2021	0.00578248	0.028612		Row 5	5	1.747	0.3494	0.0030988
				0.0169	0.016	0.0167					0.0155	0.0153	0.0108
5.06	72.5	3 (70%)		0.3573	0.36	0.3697	0.3312	0.334	0.3426		0.0994	0.0951	0.0923	0.0819	0.0799	0.0778	0.238593	0.243187	0.253427		3 (70%)	0.245069	0.00759414	0.0309878		Column 1	5	1.919	0.3838	0.0210852
				0.0261	0.026	0.0271					0.0175	0.0152	0.0145													Column 2	5	1.894	0.3788	0.0172337
5.01	63.8	4 (80%)		0.426	0.4477	0.4301	0.384	0.4033	0.3881		0.1057	0.1101	0.1087	0.0864	0.09	0.0887	0.253141	0.266496	0.254673		4 (80%)	0.258103	0.00730848	0.0283161		Column 3	5	2.002	0.4004	0.0128873
				0.042	0.0444	0.042					0.0193	0.0201	0.02													Column 4	5	2.019	0.4038	0.0168577
4.94	63	5 (95%)		0.6195	0.611	0.6307	0.5053	0.4977	0.516		0.1123	0.1195	0.1201	0.0888	0.0878	0.0968	0.354794	0.349172	0.357094		5 (95%)	0.353686	0.00407553	0.011523		Column 5	5	2.158	0.4316	0.0093193
				0.1142	0.1133	0.1147					0.0235	0.0317	0.0233
																										variance analysis
Freeze fruit (g)	Volume (ml)	Time																			Time	Average content				Heterogenous differences	SS	df	MS	F	P-value	F crit
5	61.7	1 (0.5h)		1.1121	1.1276	1.1808	0.8488	0.8608	0.9075		0.3622	0.3498	0.3634	0.206	0.2161	0.2166	0.529832	0.531398	0.569479		1 (0.5h)	0.54357	0.0224516	0.041304		Row	0.279745	4	0.0699364	37.5657	6.05354e-08	3.00692
				0.2633	0.2668	0.2733					0.1562	0.1337	0.1468													Column	0.00862264	4	0.00215566	1.15789	0.365785	3.00692
5.22	62.9	2 (1h)		1.0551	1.1761	1.1885	0.7232	0.8246	0.8471		0.2358	0.2677	0.2708	0.1674	0.1837	0.1838	0.447349	0.515843	0.533873		2 (1h)	0.499022	0.045649	0.0914769		Error	0.0297874	16	0.00186171
				0.3319	0.3515	0.3414					0.0684	0.084	0.087
4.95	61.4	3 (3h)		1.1056	1.1239	1.1536	0.8459	0.856	0.8831		0.286	0.2966	0.3368	0.1844	0.192	0.2083	0.548076	0.550147	0.559095		3 (3h)	0.552439	0.00585648	0.0106011		Grand Total	0.318155	24
				0.2597	0.2679	0.2705					0.1016	0.1046	0.1285
4.99	61.3	4 (6h)		1.0947	1.0839	1.1348	0.8511	0.8396	0.8838		0.2219	0.2274	0.2547	0.1556	0.1599	0.1715	0.570696	0.557731	0.584481		4 (6h)	0.570969	0.0133771	0.0234288
				0.2436	0.2443	0.251					0.0663	0.0675	0.0832
5	64	5 (24h)		1.0058	1.0945	1.112	0.8068	0.8783	0.8905		0.3076	0.2884	0.3243	0.1958	0.1893	0.214	0.522395	0.589083	0.578396		5 (24h)	0.563291	0.0358184	0.0635877
				0.199	0.2162	0.2215					0.1118	0.0991	0.1103
Freeze fruit (g)	Volume (ml)	Temperature																			Temperature	Average content
5.37	62.9	1 (25)		1.1649	1.1649	0.9976	0.8661	0.8681	0.732		0.2632	0.2853	0.2703	0.185	0.1973	0.1887	0.532886	0.524828	0.425073		1 (25)	0.494262	0.0600551	0.121505
				0.2988	0.2968	0.2656					0.0782	0.088	0.0816
5.46	65.1	2 (30)		1.0805	1.1027	1.1075	0.7869	0.8034	0.8116		0.2808	0.2858	0.2812	0.1502	0.1522	0.1513	0.507073	0.518621	0.525868		2 (30)	0.517188	0.00947927	0.0183285
				0.2936	0.2993	0.2959					0.1306	0.1336	0.1299
4.96	59.5	3 (40)		0.9837	1.0397	0.9903	0.7251	0.7667	0.7319		0.2556	0.2948	0.2477	0.1697	0.1965	0.1649	0.445029	0.456888	0.454324		3 (40)	0.452081	0.00623968	0.0138021
				0.2586	0.273	0.2584					0.0859	0.0983	0.0828
5.65	66.5	4 (50)		1.0948	1.1106	1.1222	0.7855	0.7989	0.8053		0.2884	0.2387	0.3271	0.1674	0.1509	0.1767	0.485936	0.509443	0.494191		4 (50)	0.496524	0.0119257	0.0240183
				0.3093	0.3117	0.3169					0.121	0.0878	0.1504
5.24	62.7	5 (60)		1.0839	1.1202	1.0661	0.7989	0.8286	0.7826		0.2206	0.2895	0.2841	0.1552	0.1849	0.1759	0.514478	0.514478	0.484906		5 (60)	0.504621	0.0170736	0.0338345
				0.285	0.2916	0.2835					0.0654	0.1046	0.1082
Freeze fruit (g)	Volume (ml)	Liquid to Solid Ratio																			Liquid to Solid Ratio	Average content
5.05	18.72	1 (3:1)		1.5593	1.4488	1.629	1.3787	1.2607	1.4307		0.394	0.4393	0.4836	0.2663	0.2861	0.291	0.275437	0.241317	0.282197		1 (3:1)	0.266317	0.0219129	0.082281
				0.1806	0.1881	0.1983					0.1277	0.1532	0.1926
4.97	34.05	2 (5:1)		1.2259	1.2705	1.3158	0.8747	0.9152	0.9367		0.3871	0.3951	0.4366	0.2079	0.2074	0.2255	0.305143	0.323906	0.325462		2 (5:1)	0.31817	0.0113085	0.0355423
				0.3512	0.3553	0.3791					0.1792	0.1877	0.2111
5.06	60.6	3 (10:1)		0.9071	0.8634	0.8632	0.6601	0.6199	0.6218		0.2446	0.2373	0.2286	0.1479	0.1425	0.1321	0.409741	0.381902	0.391742		3 (10:1)	0.394461	0.0141172	0.0357886
				0.247	0.2435	0.2414					0.0967	0.0948	0.0965
4.96	90.9	4 (15:1)		0.5623	0.6024	0.5679	0.4143	0.4454	0.4169		0.1402	0.2521	0.1766	0.0878	0.1403	0.1061	0.39968	0.373484	0.380461		4 (15:1)	0.384542	0.0135666	0.0352798
				0.148	0.157	0.151					0.0524	0.1118	0.0705
5.05	129	5 (20:1)		0.4055	0.407	0.4067	0.2978	0.2998	0.2984		0.1068	0.1176	0.13115	0.0679	0.0735	0.07885	0.39227	0.386127	0.37461		5 (20:1)	0.384336	0.00896519	0.0233265
				0.1077	0.1072	0.1083					0.0389	0.0441	0.0523
Freeze fruit (g)	Volume (ml)	Response surface optimization
5.3	81	1		0.5766	0.612	0.6086	0.5529	0.5874	0.586		0.0641	0.0663	0.0658	0.0585	0.0591	0.0609	0.504702	0.539308	0.536042			0.526684	0.0191069	0.0362778		0.034462
				0.0237	0.0246	0.0226					0.0056	0.0072	0.0049
3.53	56.625	2		0.628	0.643	0.6565	0.6015	0.623	0.629		0.0786	0.0738	0.0798	0.0656	0.064	0.0662	0.574202	0.598953	0.603025			0.59206	0.0155988	0.0263466
				0.0265	0.02	0.0275					0.013	0.0098	0.0136
5.65	36.35	3		1.0551	1.1761	1.1885	0.7232	0.8246	0.8471		0.2358	0.2677	0.2708	0.1674	0.1837	0.1838	0.238848	0.275419	0.285045			0.266437	0.0243729	0.0914769
				0.3319	0.3515	0.3414					0.0684	0.084	0.087
3.96	49.5	4		0.5273	0.5485	0.53	0.4629	0.4831	0.4643		0.0601	0.059	0.0616	0.0156	0.014	0.0152	0.373471	0.391672	0.374973			0.380039	0.0101029	0.026584
				0.0644	0.0654	0.0657					0.0445	0.045	0.0464
2.05	41	5		0.2382	0.2354	0.2346	0.1967	0.1944	0.1916		0.0431	0.0415	0.0504	0.0136	0.0136	0.0191	0.244605	0.241533	0.230445			0.238861	0.00744883	0.0311848
				0.0415	0.041	0.043					0.0295	0.0279	0.0313
2.61	68.4	6		0.5294	0.5256	0.531	0.3938	0.3939	0.3948		0.0726	0.0659	0.076	0.0549	0.051	0.0563	0.593246	0.600248	0.592546			0.595346	0.00425916	0.00715409
				0.1356	0.1317	0.1362					0.0177	0.0149	0.0197
3.85	61.25	7		0.6032	0.6209	0.6173	0.5817	0.5913	0.5942		0.0734	0.0799	0.0744	0.0609	0.0623	0.0622	0.553431	0.562145	0.565333			0.560303	0.00616096	0.0109958
				0.0215	0.0296	0.0231					0.0125	0.0176	0.0122
2.58	69.6	8		0.382	0.4017	0.3954	0.3649	0.3848	0.3771		0.0512	0.0553	0.052	0.0413	0.0434	0.0417	0.583103	0.615178	0.604366			0.600882	0.0163185	0.0271575
				0.0171	0.0169	0.0183					0.0099	0.0119	0.0103
3.87	48.375	9		0.4833	0.5045	0.5117	0.4773	0.4983	0.5068		0.0607	0.0656	0.0603	0.0551	0.0555	0.0541	0.352513	0.369713	0.377979			0.366735	0.0129915	0.0354246
				0.006	0.0062	0.0049					0.0056	0.0101	0.0062
4.17	66.75	10		0.6277	0.6793	0.6518	0.6014	0.6381	0.6229		0.0768	0.087	0.0689	0.0646	0.0644	0.0598	0.573951	0.613405	0.602072			0.596476	0.0203134	0.0340556
				0.0263	0.0412	0.0289					0.0122	0.0226	0.0091
2.54	67	11		0.3175	0.3286	0.3183	0.3085	0.3145	0.3085		0.0506	0.0486	0.0453	0.0421	0.0384	0.0376	0.469378	0.486469	0.477307			0.477718	0.00855277	0.0179034
				0.009	0.0141	0.0098					0.0085	0.0102	0.0077													#REF!
5.25	33.5	12		1.4836	1.5822	1.5075	1.4519	1.5327	1.474		0.1792	0.2008	0.1825	0.1512	0.1574	0.1548	0.554383	0.586179	0.562268			0.56761	0.0165574	0.0291704
				0.0317	0.0495	0.0335					0.028	0.0434	0.0277
4.22	67.5	13		0.6171	0.5959	0.6135	0.471	0.4617	0.4684		0.0893	0.0815	0.0928	0.0583	0.0594	0.0608	0.440934	0.429822	0.435485			0.435414	0.00555609	0.0127605
				0.1461	0.1342	0.1451					0.031	0.0221	0.032
5.83	38.1	14		0.6878	0.7184	0.6748	0.6489	0.6646	0.6386		0.0831	0.0855	0.0912	0.0651	0.0635	0.069	0.25484	0.262392	0.248642			0.255291	0.00688627	0.0269742
				0.0389	0.0538	0.0362					0.018	0.022	0.0222
3.97	66.75	15		0.67	0.6742	0.6146	0.6051	0.6097	0.5495		0.0741	0.0759	0.0744	0.0227	0.0242	0.0237	0.654078	0.65756	0.590512			0.63405	0.037745	0.05953
				0.0649	0.0645	0.0651					0.0514	0.0517	0.0507
8.73	43.65	16		1.35	1.3368	1.3542	1.339	1.3354	1.3443		0.1356	0.1358	0.1351	0.1269	0.1271	0.1251	0.404814	0.403545	0.407186			0.405182	0.00184778	0.00456036
				0.011	0.0014	0.0099					0.0087	0.0087	0.01
3.96	49.5	17		0.5804	0.5984	0.6021	0.5458	0.5523	0.5605		0.0546	0.0543	0.0546	0.0516	0.0494	0.0508	0.412629	0.419893	0.425571			0.419365	0.006487	0.0154686		0.353374
				0.0346	0.0461	0.0416					0.003	0.0049	0.0038

## Sheet: Sheet2
					[HCl]	Contents			Average Content	Volume (ml)	Freeze fruit (g)	Anthocyanins contents (mg/g)			Average data (mg/g)	SD		Average+SD		[HCl]
					1 (0.02%)	0.395433	0.483486	0.352294	0.410404	63.7	5.04	4.99784	6.11072	4.4526	5.18705	0.8451		5.187±0.845		1 (0.02%)
					2 (0.05%)	0.369486	0.35405	0.350313	0.35795	61.3	5.04	4.49395	4.3062	4.26075	4.35363	0.123621		4.354±0.124		2 (0.05%)
					3 (0.1%)	0.380526	0.350094	0.347721	0.359447	63.2	4.98	4.82917	4.44297	4.41284	4.56166	0.23216		4.562±0.232		3 (0.1%)
					4 (0.3%)	0.332038	0.332295	0.259032	0.307788	63.5	4.95	4.25948	4.26277	3.32294	3.9484	0.541663		3.948±0.542		4 (0.3%)
					5 (0.5%)	0.343017	0.342177	0.370146	0.35178	63.5	5.05	4.31318	4.30262	4.65431	4.42337	0.200068		4.423±0.200		5 (0.5%)
					[Ethanol]	Contents			Average Content	Volume (ml)	Freeze fruit (g)	Anthocyanins contents (mg/g)			Average data (mg/g)	SD		Average+SD		[Ethanol]
					1 (50%)	0.191584	0.196249	0.227713	0.205182	64.5	5.08	2.43252	2.49174	2.89124	2.60516	0.24951		2.605±0.250		1 (50%)
					2 (60%)	0.203415	0.207111	0.195773	0.2021	64	5.09	2.55768	2.60414	2.46158	2.54113	0.072707		2.541±0.073		2 (60%)
					3 (70%)	0.238593	0.243187	0.253427	0.245069	72.5	5.06	3.41857	3.48439	3.63112	3.51136	0.108809		3.511±0.109		3 (70%)
					4 (80%)	0.253141	0.266496	0.254673	0.258103	63.8	5.01	3.22364	3.3937	3.24314	3.28683	0.0930701		3.287±0.093		4 (80%)
					5 (95%)	0.354794	0.349172	0.357094	0.353686	63	4.94	4.5247	4.453	4.55403	4.51058	0.0519754		4.511±0.052		5 (95%)
					Time	Contents			Average Content	Volume (ml)	Freeze fruit (g)	Anthocyanins contents (mg/g)			Average data (mg/g)	SD		Average+SD		Time
					1 (0.5h)	0.529832	0.531398	0.569479	0.54357	61.7	5	6.53813	6.55746	7.02737	6.70765	0.277053		6.708±0.277		1 (0.5h)
					2 (1h)	0.447349	0.515843	0.533873	0.499022	62.9	5.22	5.39047	6.21581	6.43306	6.01311	0.550061		6.013±0.550		2 (1h)
					3 (3h)	0.548076	0.550147	0.559095	0.552439	61.4	4.95	6.79835	6.82405	6.93504	6.85248	0.072644		6.852±0.073		3 (3h)
					4 (6h)	0.570696	0.557731	0.584481	0.570969	61.3	4.99	7.01075	6.85148	7.1801	7.01411	0.164332		7.014±0.164		4 (6h)
					5 (24h)	0.522395	0.589083	0.578396	0.563291	64	5	6.68665	7.54027	7.40347	7.21013	0.458476		7.210±0.458		5 (24h)
					Temperature	Contents			Average Content	Volume (ml)	Freeze fruit (g)	Anthocyanins contents (mg/g)			Average data (mg/g)	SD		Average+SD		Temperature
					1 (25)	0.532886	0.524828	0.425073	0.494262	62.9	5.37	6.24182	6.14742	4.97897	5.78941	0.703439		5.789±0.703		1 (25)
					2 (30)	0.507073	0.518621	0.525868	0.517188	65.1	5.46	6.04587	6.18356	6.26997	6.16647	0.113022		6.166±0.113		2 (30)
					3 (40)	0.445029	0.456888	0.454324	0.452081	59.5	4.96	5.33856	5.48082	5.45006	5.42314	0.074851		5.423±0.075		3 (40)
					4 (50)	0.485936	0.509443	0.494191	0.496524	66.5	5.65	5.71943	5.9961	5.81659	5.84404	0.140364		5.844±0.140		4 (50)
					5 (60)	0.514478	0.514478	0.484906	0.504621	62.7	5.24	6.15607	6.15607	5.80222	6.03812	0.204297		6.038±0.204		5 (60)
					Liquid to Solid Ratio	Contents			Average Content	Volume (ml)	Freeze fruit (g)	Anthocyanins contents (mg/g)			Average data (mg/g)	SD		Average+SD		Liquid to Solid Ratio
					1 (3:1)	0.275437	0.241317	0.282197	0.266317	18.72	5.05	1.02103	0.894546	1.04608	0.98722	0.0812294		0.987±0.081		1 (3:1)
					2 (5:1)	0.305143	0.323906	0.325462	0.31817	34.05	4.97	2.09057	2.21911	2.22977	2.17982	0.0774758		2.180±0.077		2 (5:1)
					3 (10:1)	0.409741	0.381902	0.391742	0.394461	60.6	5.06	4.90717	4.57377	4.69161	4.72418	0.169072		4.724±0.169		3 (10:1)
					4 (15:1)	0.39968	0.373484	0.380461	0.384542	90.9	4.96	7.32479	6.84469	6.97257	7.04735	0.248629		7.047±0.249		4 (15:1)
					5 (20:1)	0.39227	0.386127	0.37461	0.384336	129	5.05	10.0204	9.86345	9.56924	9.81768	0.229012		9.818±0.229		5 (20:1)
	A	B	C
Group	Time	Ethanol concentration	Liquid to Solid ratio
-1	0.5	50	5:1
0	12.25	72.5	12.5:1
1	24	95	20:1															Average+SD
1	0	0	0			0.504702	0.539308	0.536042	0.526684	81	5.3	7.71337	8.24226	8.19234	8.04932	0.292012		8.049±0.292
2	0	0	0			0.574202	0.598953	0.603025	0.59206	56.625	3.53	9.21082	9.60785	9.67316	9.49728	0.250221		9.497±0.250
3	1	0	-1			0.238848	0.275419	0.285045	0.266437	36.35	5.65	1.53666	1.77194	1.83387	1.71416	0.156806		1.714±0.157
4	0	0	0			0.373471	0.391672	0.374973	0.380039	49.5	3.96	4.66838	4.8959	4.68717	4.75048	0.126287		4.750±0.126
5	-1	0	1			0.244605	0.241533	0.230445	0.238861	41	2.05	4.89211	4.83065	4.60889	4.77722	0.148977		4.777±0.149
6	0	1	1			0.593246	0.600248	0.592546	0.595346	68.4	2.61	15.5471	15.7306	15.5288	15.6022	0.111619		15.602±0.112
7	0	0	0			0.553431	0.562145	0.565333	0.560303	61.25	3.85	8.80459	8.94322	8.99394	8.91392	0.0980153		8.914±0.098
8	1	0	1			0.583103	0.615178	0.604366	0.600882	69.6	2.58	15.7302	16.5955	16.3038	16.2098	0.440219		16.210±0.440
9	-1	-1	-1			0.352513	0.369713	0.377979	0.366735	48.375	3.87	4.40642	4.62142	4.72474	4.58419	0.162393		4.584±0.162
10	1	1	0			0.573951	0.613405	0.602072	0.596476	66.75	4.17	9.18735	9.8189	9.63748	9.54791	0.32516		9.548±0.325
11	0	-1	1			0.469378	0.486469	0.477307	0.477718	67	2.54	12.3812	12.832	12.5904	12.6012	0.225605		12.601±0.226
12	0	1	-1			0.554383	0.586179	0.562268	0.56761	33.5	5.25	3.53749	3.74038	3.58781	3.62189	0.105652		3.622±0.106
13	1	-1	0			0.440934	0.429822	0.435485	0.435414	67.5	4.22	7.05285	6.87512	6.96569	6.96455	0.088871		6.965±0.089
14	0	-1	-1			0.25484	0.262392	0.248642	0.255291	38.1	5.83	1.66542	1.71477	1.62491	1.66837	0.0450029		1.668±0.045
15	0	0	0			0.654078	0.65756	0.590512	0.63405	66.75	3.97	10.9974	11.0559	9.92864	10.6607	0.63463		10.661±0.635
16	-1	0	-1			0.404814	0.403545	0.407186	0.405182	43.65	8.73	2.02407	2.01773	2.03593	2.02591	0.00923888		2.026±0.009
17	-1	1	0			0.412629	0.419893	0.425571	0.419365	49.5	3.96	5.15787	5.24867	5.31964	5.24206	0.0810875		5.242±0.081
	A	B	C
Group	Time	Ethanol concentration	Liquid to Solid ratio	Anthocyanins Content (mg/g)
-1	0.5	50	5:1
0	12.25	72.5	12.5:1
1	24	95	20:1
1	12.25	72.5	12.5:1	8.049±0.292
2	12.25	72.5	12.5:1	9.497±0.250
3	24	72.5	5:1	1.714±0.157
4	12.25	72.5	12.5:1	4.750±0.126
5	0.5	72.5	20:1	4.777±0.149
6	12.25	95	20:1	15.602±0.112
7	12.25	72.5	12.5:1	8.914±0.098
8	24	72.5	20:1	16.210±0.440
9	0.5	50	5:1	4.584±0.162
10	24	95	12.5:1	9.548±0.325
11	12.25	50	20:1	12.601±0.226
12	12.25	95	5:1	3.622±0.106
13	24	50	12.5:1	6.965±0.089
14	12.25	50	5:1	1.668±0.045
15	12.25	72.5	12.5:1	10.661±0.635
16	0.5	72.5	5:1	2.026±0.009
17	0.5	95	12.5:1	5.242±0.081
